# Supplementary material
Source: PubMed Central journal article supplement (PMC3913300)
Supplement: chest_145_2_313_ds01.pdf [file chest_145_2_313_ds01.pdf]

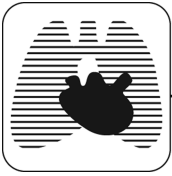

## Differences in End-of-Life Care in the ICU Across Patients Cared for by Medicine, Surgery, Neurology, and Neurosurgery Physicians

*Erin K. Kross, MD; Ruth A. Engelberg, PhD; Lois Downey, MA; Joseph Cuschieri, MD;  
Matthew R. Hallman, MD; W. T. Longstreth Jr, MD, MPH; David L. Tirschwell, MD;  
and J. Randall Curtis, MD, MPH, FCCP*

### **e-Appendix 1.**

Study procedures were approved by the IRB at each study site: University of Washington IRB#23504-G, VA Puget Sound RDIS#0004, Virginia Mason IRB#4225, Stevens Hospital IRB#81520, Swedish IR#3964, Highline no ROC#, St. Joseph/Franciscan no MREC#, Evergreen IRB#EHC-04-009, Overlake IR#0404, Northwest no ROC#, Valley no ROC#.

*Online supplements are not copyedited prior to posting.*
